# Supplementary material for: Improving the corrosion resistance and bioactivity of magnesium by a carbonate conversion-polycaprolactone duplex coating approach
Source: Royal Society of Chemistry journal article supplement (doi:10.1039/c9nj06030h), 2020-01-01
Supplement: c9nj06030h1.pdf [file c9nj06030h1.pdf]

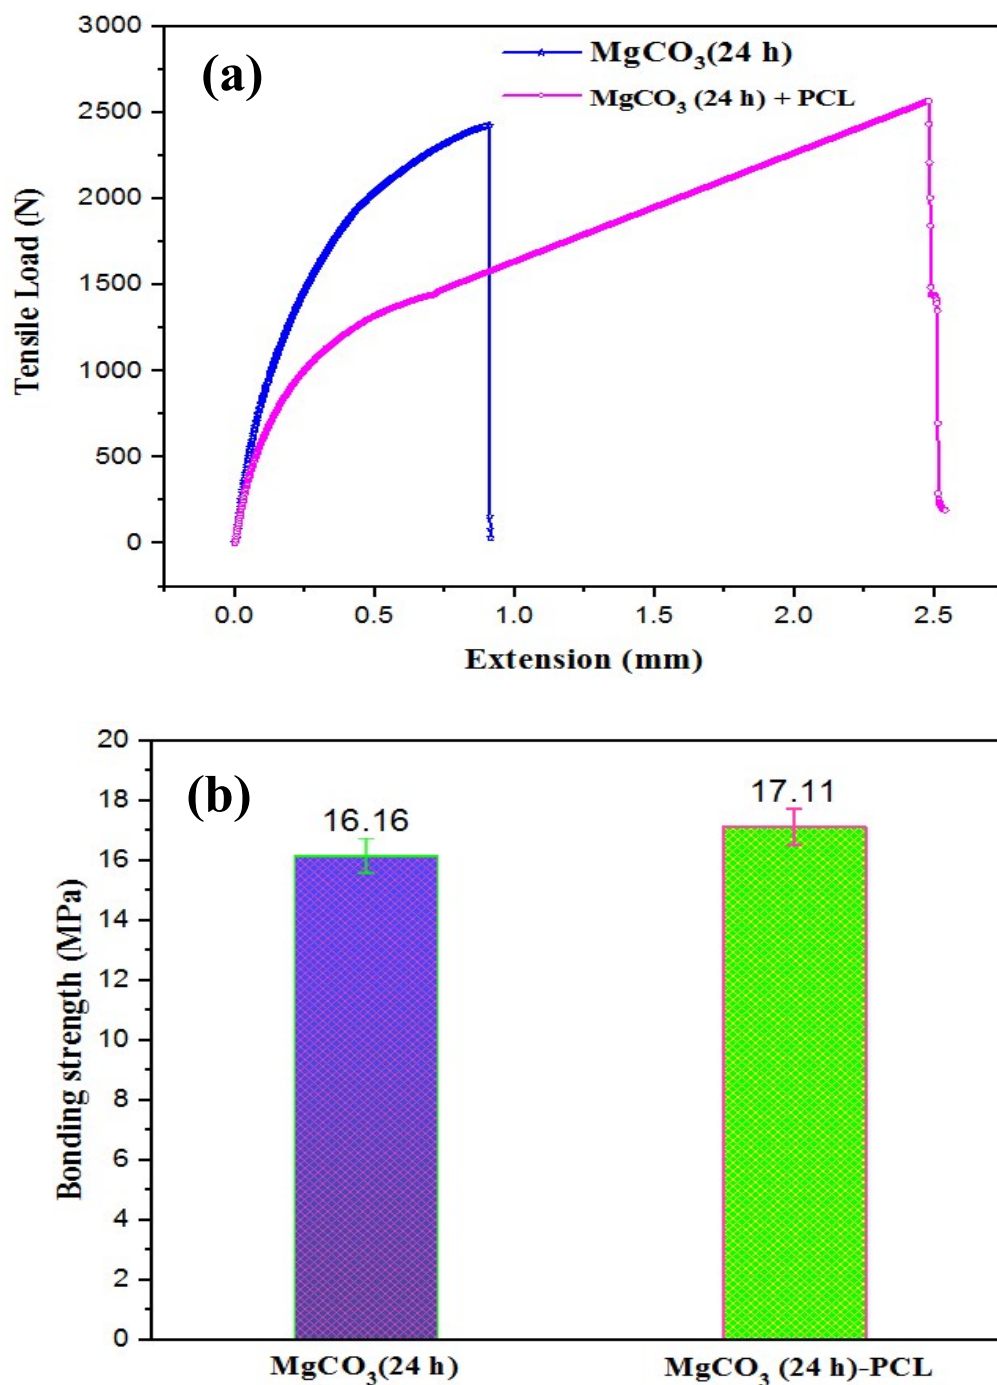

Fig. S1 Comparison of the (a) tensile-extension plots; and (b) interface bonding strength of  $\text{MgCO}_3(24 \text{ h})$  coated Mg and  $\text{MgCO}_3(24 \text{ h}) - \text{PCL}$  duplex coated Mg

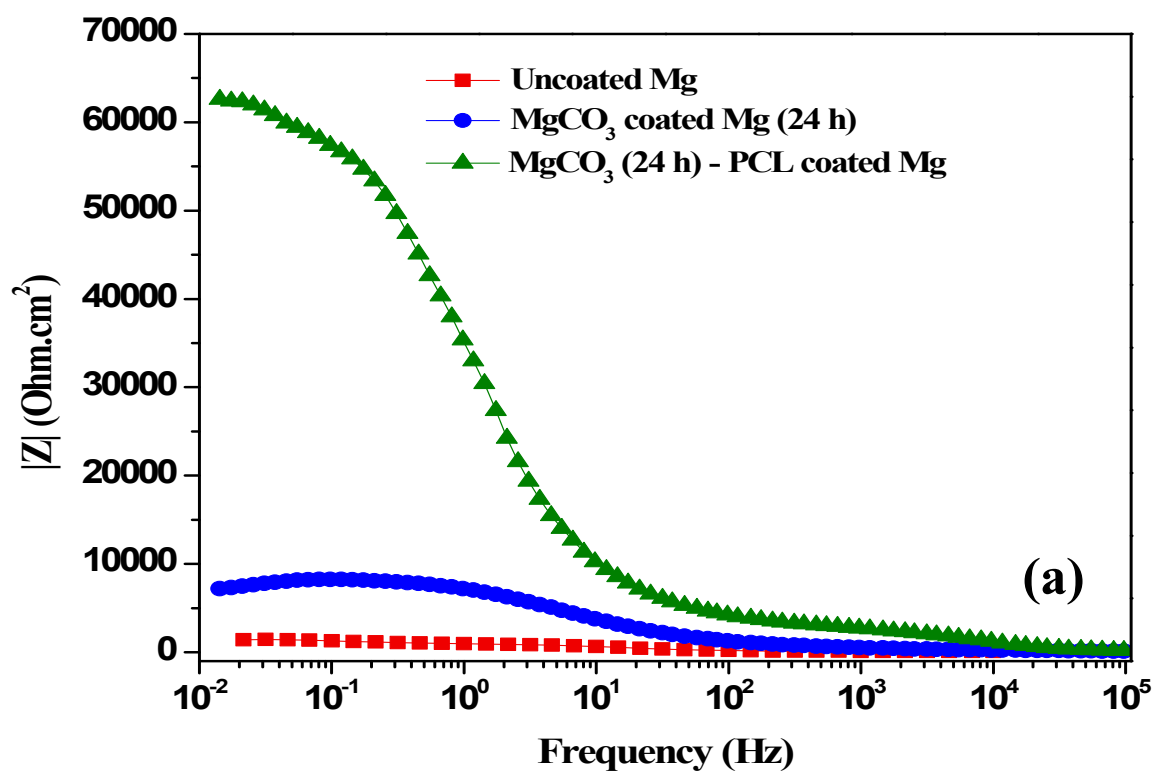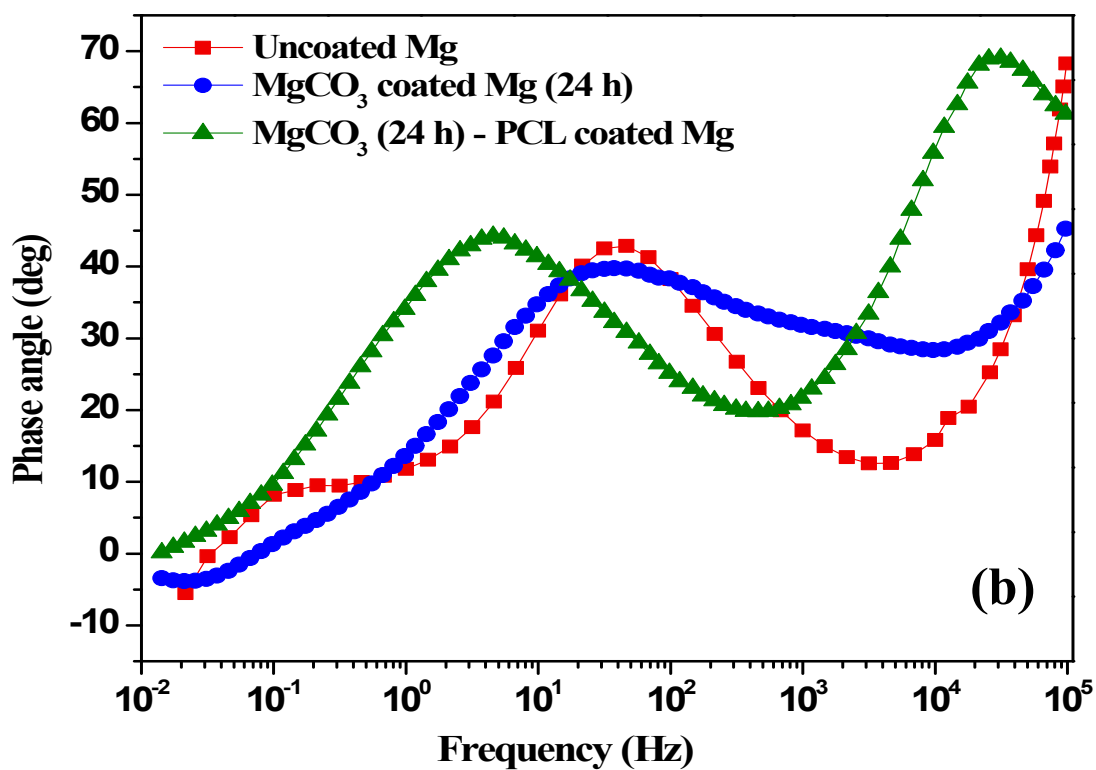

Fig. S2 (a) Bode impedance; and (b) Bode phase angle plots of uncoated Mg, MgCO<sub>3</sub> (24 h) coated Mg and MgCO<sub>3</sub> (24 h) – PCL coated Mg, in HBSS, recorded at their respective open circuit potentials

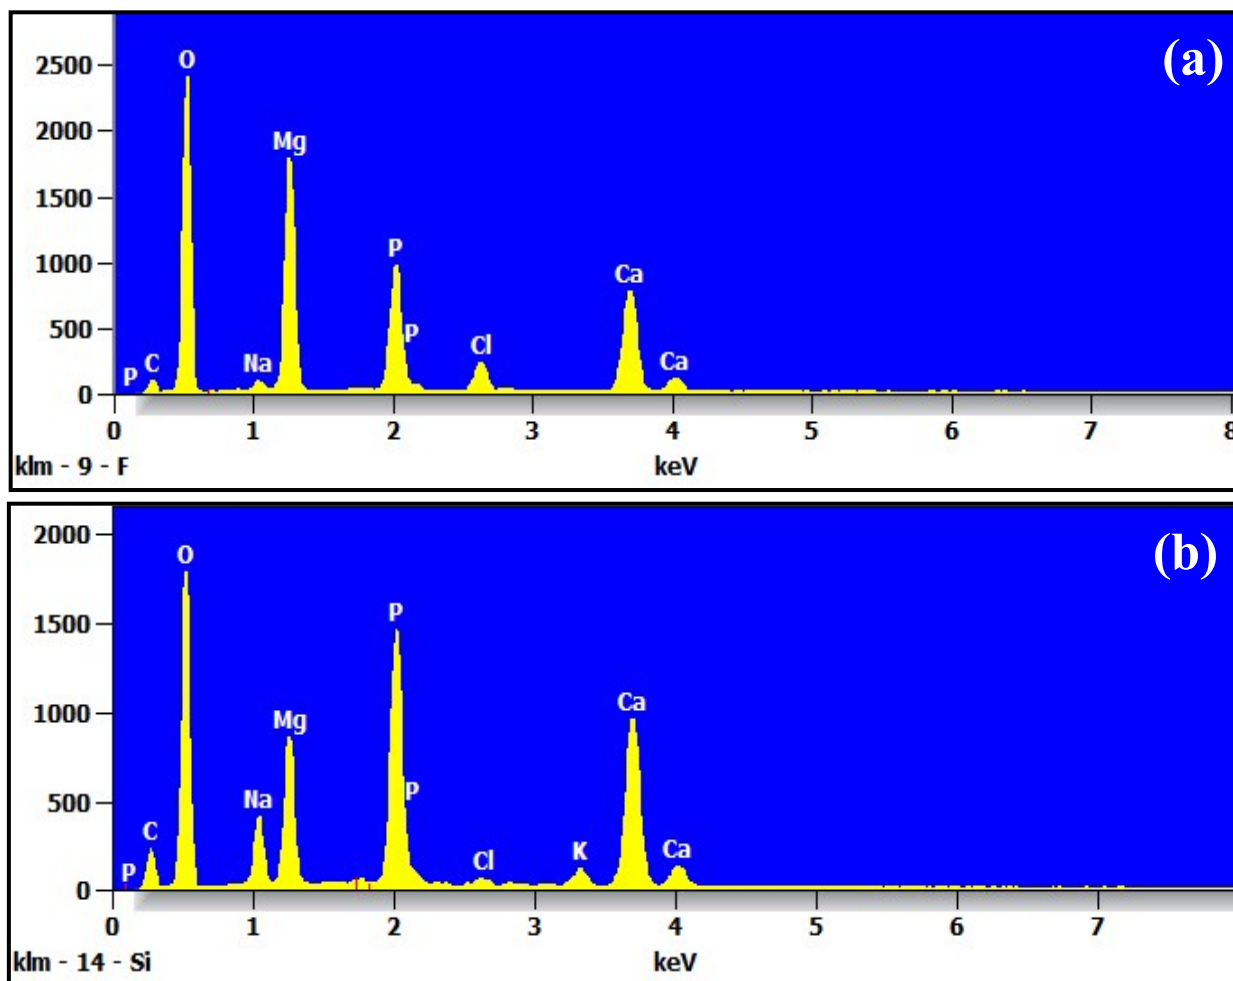

**Fig. S3 EDS spectra acquired at the surface of (a) MgCO<sub>3</sub> (24 h) coated Mg; and (b) MgCO<sub>3</sub> (24 h) - PCL coated Mg after immersion in HBSS at 37 ± 1 °C for 10 days**

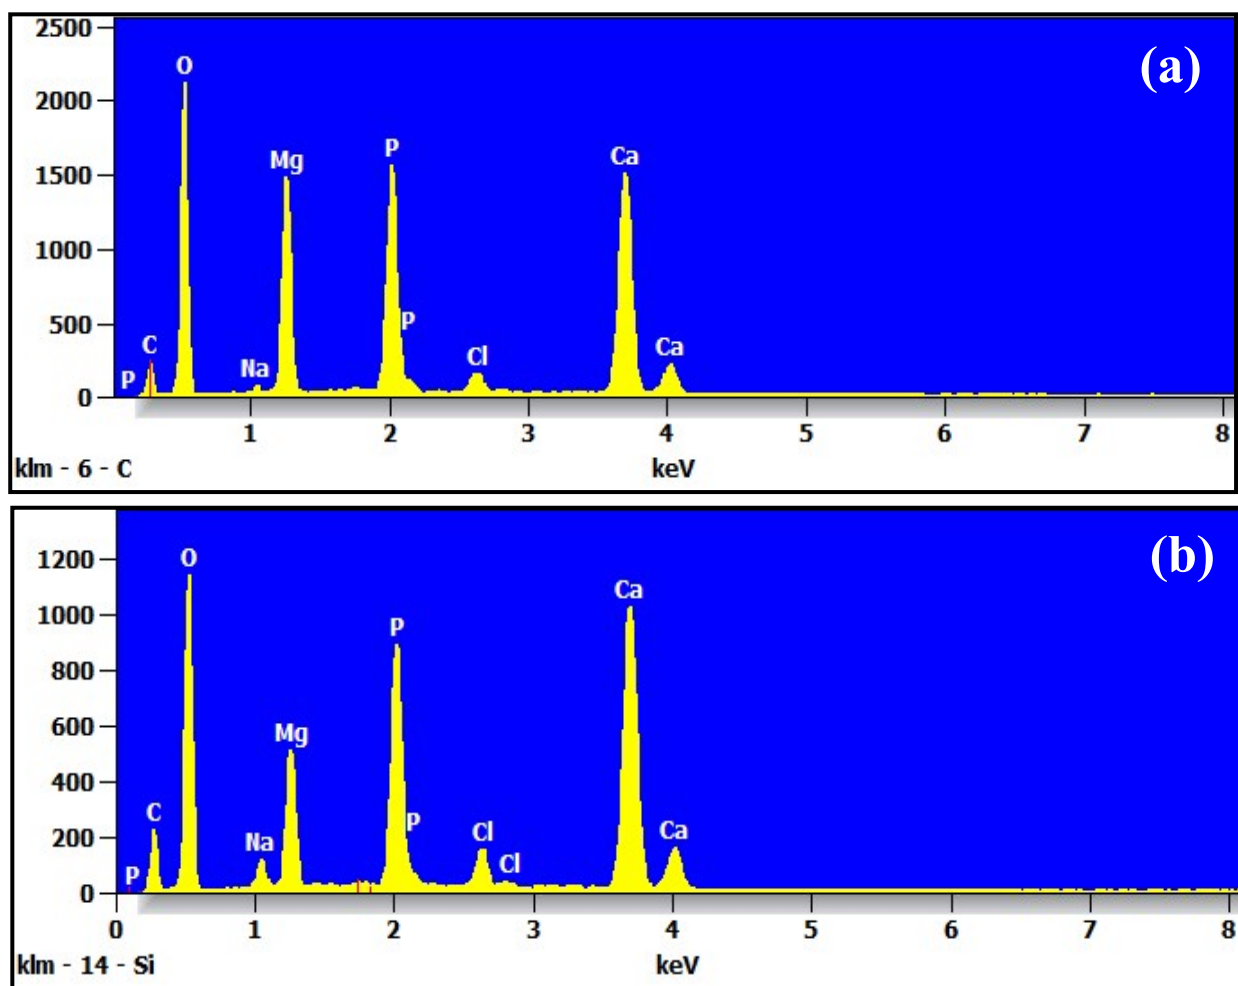

**Fig. S4 EDS spectra acquired at the surface of (a) MgCO<sub>3</sub> (24 h) coated Mg; and (b) MgCO<sub>3</sub> (24 h) - PCL coated Mg after immersion in SBF at 37 ± 1 °C for 10 days**
